# Supplementary material for: De novo chromosome-level genome assembly of two mycoparasitic hypocreaceous fungi
Source: Research Square preprint supplement (doi:10.21203/rs.3.rs-8248488/v1), 2026-02-06
Supplement: Supplementary file 1 [file 01fb0635f33ee03954a146db.xlsx]

## Sheet: Sheet1
Database	Strain	Genome ID	Resource link	Publication doi
NCBI	Cladobotryum mycophilum ATHUM6906	GCA_036429605.1	https://www.ncbi.nlm.nih.gov/datasets/genome/GCA_036429605.1/	10.1093/g3journal/jkae006
NCBI	Cladobotryum protrusum CCMJ2080	GCA_004303015.1	https://www.ncbi.nlm.nih.gov/datasets/genome/GCA_004303015.1/	10.3390/genes10020124
NCBI	Cladobotryum mycophilum CCMJ2923	GCA_032358155.1	https://www.ncbi.nlm.nih.gov/datasets/genome/GCA_032358155.1/	nowhere		删除
JGI	Trichoderma harzianum CBS 226.95	1184864	https://mycocosm.jgi.doe.gov/Triha1	10.1186/s12864-019-5680-7
JGI	Trichoderma virens Gv29-8	1184795	https://mycocosm.jgi.doe.gov/TriviGv29_8_2	10.1186/s12864-019-5680-7
JGI	Trichoderma reesei QM6a	1184794	https://mycocosm.jgi.doe.gov/Trire2	10.1186/s12864-019-5680-7
JGI	Trichoderma atroviride IMI 206040	1184793	https://mycocosm.jgi.doe.gov/Triat2	10.1186/s12864-019-5680-7
JGI	Trichoderma brevicompactum SZMC 28004	1232507	https://mycocosm.jgi.doe.gov/Tribrev1	unpublished		删除
NCBI	Mycogone perniciosa HP10	GCA_008477525.1	https://www.ncbi.nlm.nih.gov/datasets/genome/GCA_008477525.1/	10.3390/genes10060417
NCBI	Hypomyces rosellus CCMJ2808	GCA_011799845.1	https://www.ncbi.nlm.nih.gov/datasets/genome/GCA_011799845.1/	10.3390/pathogens9030232
NCBI	Escovopsis weberi CC031208-10	GCA_001278495.1	https://www.ncbi.nlm.nih.gov/datasets/genome/GCA_001278495.1/	10.1073/pnas.1518501113
NCBI	Tolypocladium inflatum NRRL 8044	GCA_003945665.1	https://www.ncbi.nlm.nih.gov/datasets/genome/GCA_003945665.1/	10.1371/journal.pgen.1003496
NCBI	Mycogone perniciosa MgR1	GCA_025331125.1	https://www.ncbi.nlm.nih.gov/datasets/genome/GCA_025331125.1/	/10.1007/s42770-021-00535-x		增加

## Sheet: Sheet2
Database	Strain	Genome ID	Resource link	Publication doi
NCBI	Hypomyces mycophilus ATHUM6906	GCA_036429605.1	https://www.ncbi.nlm.nih.gov/datasets/genome/GCA_036429605.1/	10.1093/g3journal/jkae006
NCBI	Hypomyces protrusus CCMJ2080	GCA_004303015.1	https://www.ncbi.nlm.nih.gov/datasets/genome/GCA_004303015.1/	10.3390/genes10020124
NCBI	Hypomyces rosellus CCMJ2808	GCA_011799845.1	https://www.ncbi.nlm.nih.gov/datasets/genome/GCA_011799845.1/	10.3390/pathogens9030232
NCBI	Mycogone perniciosa HP10	GCA_008477525.1	https://www.ncbi.nlm.nih.gov/datasets/genome/GCA_008477525.1/	10.3390/genes10060417
NCBI	Mycogone perniciosa MgR1	GCA_025331125.1	https://www.ncbi.nlm.nih.gov/datasets/genome/GCA_025331125.1/	10.1007/s42770-021-00535-x
NCBI	Tolypocladium inflatum NRRL 8044	GCA_003945665.1	https://www.ncbi.nlm.nih.gov/datasets/genome/GCA_003945665.1/	10.1371/journal.pgen.1003496
NCBI	Escovopsis weberi CC031208-10	GCA_001278495.1	https://www.ncbi.nlm.nih.gov/datasets/genome/GCA_001278495.1/	10.1073/pnas.1518501113
JGI	Trichoderma harzianum CBS 226.95	1184864	https://mycocosm.jgi.doe.gov/Triha1	10.1186/s12864-019-5680-7
JGI	Trichoderma virens Gv29-8	1184795	https://mycocosm.jgi.doe.gov/TriviGv29_8_2	10.1186/s12864-019-5680-7
JGI	Trichoderma reesei QM6a	1184794	https://mycocosm.jgi.doe.gov/Trire2	10.1186/s12864-019-5680-7
JGI	Trichoderma atroviride IMI 206040	1184793	https://mycocosm.jgi.doe.gov/Triat2	10.1186/s12864-019-5680-7
